# Supplementary material
Source: publisher figshare collection journal article supplement (https://gsajournals.figshare.com/articles/dataset/_/14551446)
Supplement: Supplementary file 1 [file 1]

## Sheet: Table S2
Table S2. The expression patterns of genes involved in the mRNA surveillance pathway, spliceosome pathway and base excision repair pathway.
Spliceosome	Symbol	Description	NLH log2(fc)	PValue	FDR	NL log2(fc)	PValue	FDR	NH log2(fc)	PValue	FDR
Glyma.01G229400	RH45	PREDICTED: DEAD-box ATP-dependent RNA helicase 42-like [Glycine max]	-0.185355	0.141039	0.38789	-0.0475037	0.69737	0.900277	-0.232859	0.0136575	0.0575162
Glyma.02G010500	At2g47250	PREDICTED: probable pre-mRNA-splicing factor ATP-dependent RNA helicase [Glycine max]	-0.215968	0.0558926	0.220411	-0.0370947	0.793065	0.936877	-0.253062	0.00858576	0.0405895
Glyma.02G139900	UBA2C	PREDICTED: UBP1-associated protein 2C-like [Glycine max]	-0.498748	0.0847453	0.285507	0.185993	0.708247	0.903916	-0.312756	0.0657523	0.181358
Glyma.04G229300	SR34A	Pre-mRNA-splicing factor SF2 [Cajanus cajan]	0.0359393	0.960285	0.985319	-0.138081	0.255442	0.590465	-0.102142	0.216163	0.410188
Glyma.04G255700	U2AF65B	PREDICTED: splicing factor U2af large subunit A-like isoform X1 [Glycine max]	-0.110971	0.145808	0.395868	-0.0122324	0.860948	0.958757	-0.123204	0.0593683	0.168705
Glyma.05G005500	RH46	PREDICTED: DEAD-box ATP-dependent RNA helicase 46-like isoform X1 [Glycine max]	0.10772	0.562466	0.797151	-0.0639671	0.497483	0.794826	0.0437524	0.983541	0.992221
Glyma.05G041000	Os01g0911100	PREDICTED: DEAD-box ATP-dependent RNA helicase 30 [Glycine max]	-0.139807	0.187205	0.456497	-0.0391944	0.706228	0.903161	-0.179001	0.0319555	0.108409
Glyma.06G069200	RH56	PREDICTED: DEAD-box ATP-dependent RNA helicase 56 [Glycine max]	0.0867265	0.66995	0.856478	-0.0542251	0.529429	0.814801	0.0325015	0.909286	0.95421
Glyma.06G324000	U2AF65A	PREDICTED: splicing factor U2af large subunit B-like isoform X1 [Glycine max]	-0.064735	0.320875	0.607948	0.0508914	0.628926	0.869703	-0.0138437	0.502093	0.693604
Glyma.07G053200	RS31	PREDICTED: serine/arginine-rich splicing factor RS31-like isoform X1 [Glycine max]	0.326677	0.0962499	0.308933	-0.126601	0.400668	0.728504	0.200076	0.200114	0.390242
Glyma.07G078300	RS41	PREDICTED: serine/arginine-rich splicing factor RS41-like isoform X2 [Glycine max]	-0.345298	0.0450537	0.192197	0.0870013	0.648087	0.878283	-0.258297	0.0287049	0.100001
Glyma.09G104200	SCL30A	Serine/arginine-rich splicing factor 12 [Glycine soja]	0.518855	0.00913656	0.0622301	-0.401018	0.0100818	0.0695988	0.117836	0.697499	0.833773
Glyma.11G067300	RNU1	PREDICTED: U1 small nuclear ribonucleoprotein 70 kDa isoform X2 [Glycine max]	-0.117092	0.249487	0.532846	0.00338277	0.979269	0.993276	-0.113709	0.0777347	0.204357
Glyma.11G216200	ALY4	PREDICTED: THO complex subunit 4D-like isoform X1 [Glycine max]	0.0976862	0.804228	0.921331	-0.107409	0.325517	0.664193	-0.00972281	0.427527	0.629575
Glyma.12G064900	ALY1	RNA and export factor-binding protein 2 [Glycine soja]	0.393899	0.0111153	0.0721766	-0.254465	0.049334	0.219687	0.139434	0.303218	0.510079
Glyma.14G040800	UBA2B	PREDICTED: UBP1-associated protein 2B [Glycine max]	0.0262761	0.991242	0.997499	-0.0562666	0.496487	0.794431	-0.0299905	0.471786	0.668347
Glyma.16G121300	SR45A	PREDICTED: serine/arginine-rich splicing factor SR45a-like [Glycine max]	0.21074	0.237727	0.51889	-0.0774071	0.550941	0.827576	0.133333	0.522318	0.709608
Glyma.18G067300	SR45A	PREDICTED: serine/arginine-rich splicing factor SR45a isoform X1 [Glycine max]	0.569788	0.000254349	0.0035872	-0.367772	0.00168899	0.016728	0.202015	0.140589	0.308237
Glyma.20G177100	sap-49	PREDICTED: splicing factor 3B subunit 4-like isoform X2 [Glycine max]	-0.161202	0.580411	0.807777	-0.0452486	0.928525	0.979949	-0.206451	0.468687	0.666303
Glyma.20G236800	SR30	PREDICTED: serine/arginine-rich splicing factor SR30 [Glycine max]	0.0426443	0.997456	0.999366	-0.286344	0.115251	0.379434	-0.243699	0.0272779	0.096239
Glyma.U029000	PRP40A	PREDICTED: pre-mRNA-processing protein 40A-like isoform X1 [Glycine max]	-0.176033	0.0299787	0.14557	0.00263807	0.955785	0.987747	-0.173395	0.00531641	0.0281074
mRNA surveillance pathway	Symbol	Description	NLH log2(fc)	PValue	FDR	NL log2(fc)	PValue	FDR	NH log2(fc)	PValue	FDR
Glyma.03G076800	Rngtt	PREDICTED: mRNA-capping enzyme-like [Glycine max]	-0.0300415	0.577152	0.805621	-0.13117	0.239929	0.572085	-0.161212	0.0346664	0.114999
Glyma.05G243400	GSPT1	PREDICTED: eukaryotic peptide chain release factor GTP-binding subunit ERF3A-like isoform X1 [Glycine max]	-0.0475946	0.433788	0.706922	-0.152003	0.0895628	0.323639	-0.199598	0.00706633	0.0350331
Glyma.06G069200	RH56	PREDICTED: DEAD-box ATP-dependent RNA helicase 56 [Glycine max]	0.0867265	0.66995	0.856478	-0.0542251	0.529429	0.814801	0.0325015	0.909286	0.95421
Glyma.08G184100	PNN	PREDICTED: pinin [Glycine max]	-0.0237912	0.605266	0.822084	0.0875496	0.487998	0.788694	0.0637584	0.835464	0.916085
Glyma.10G066300	PCFS4	PREDICTED: polyadenylation and cleavage factor homolog 4-like [Glycine max]	-0.0491647	0.531351	0.777007	-0.243586	0.0790542	0.299416	-0.292751	0.00287318	0.0175791
Glyma.10G186600	Os03g0268000	PREDICTED: serine/threonine-protein phosphatase PP1-like isoform X1 [Glycine max]	-0.483847	3.51962e-05	0.000657584	0.407154	0.000279648	0.00371593	-0.0766928	0.372572	0.579695
Glyma.10G189500	RNP1	PREDICTED: heterogeneous nuclear ribonucleoprotein 1-like [Glycine max]	-0.0792248	0.436597	0.708698	-0.0427657	0.638029	0.873628	-0.121991	0.120537	0.278109
Glyma.11G055500	RNP1	PREDICTED: heterogeneous nuclear ribonucleoprotein 1-like [Glycine max]	0.187549	0.299408	0.58707	-0.0809117	0.515593	0.806809	0.106637	0.595393	0.763679
Glyma.11G216200	ALY4	PREDICTED: THO complex subunit 4D-like isoform X1 [Glycine max]	0.0976862	0.804228	0.921331	-0.107409	0.325517	0.664193	-0.00972281	0.427527	0.629575
Glyma.12G064900	ALY1	RNA and export factor-binding protein 2 [Glycine soja]	0.393899	0.0111153	0.0721766	-0.254465	0.049334	0.219687	0.139434	0.303218	0.510079
Glyma.14G016600	RNP1	PREDICTED: heterogeneous nuclear ribonucleoprotein 1 [Glycine max]	-0.151281	0.13798	0.382878	0.283557	0.0202456	0.117149	0.132277	0.401386	0.607137
Vase excision repair	Symbol	Description	NLH log2(fc)	PValue	FDR	NL log2(fc)	PValue	FDR	NH log2(fc)	PValue	FDR
Glyma.06G155300	POLD1	PREDICTED: DNA polymerase delta catalytic subunit isoform X3 [Glycine max]	-0.072298	0.535043	0.779464	0.351712	0.0561173	0.238863	0.279414	0.122198	0.280525
Glyma.11G103600	UNG	PREDICTED: uracil-DNA glycosylase, mitochondrial-like [Glycine max]	0.107856	0.873886	0.951606	0.408465	0.379671	0.711704	0.516321	0.295783	0.502708
Glyma.12G080900	LIG1	PREDICTED: DNA ligase 1 isoform X1 [Glycine max]	-0.218891	0.114171	0.342693	0.128105	0.427636	0.747732	-0.0907861	0.291237	0.497845
Glyma.13G030100	HMGB2	HMG1/2-like protein [Glycine soja]	0.0976967	0.885166	0.956333	0.679911	0.0997825	0.34644	0.777608	0.0577797	0.165478
Glyma.20G090300	FEN1	PREDICTED: flap endonuclease 1-like isoform X1 [Glycine max]	0.0289647	0.975522	0.991205	0.124247	0.472247	0.778008	0.153212	0.33944	0.547868
